# Supplementary material for: The first organoruthenium(iv) complexes containing nitrogen donor ligands by oxidative addition of allylic substrates to coordinatively unsaturated Ru(ii) complexes
Source: Royal Society of Chemistry journal article supplement (doi:10.1039/b002927k), 2000-01-01
Supplement: b002927k.doc [file b002927k.doc]

**Supplementary data: Typical procedures and spectroscopic data**

**General Procedures.** All manipulations involving air- and moisture sensitive organometallic compounds were carried out under an atmosphere of dry argon using standard Schlenk tube techniques or in a glove box under a purified N2 atmosphere. All solvents was distilled over appropriate drying agents prior to use. PhLi in cyclohexane-ether　were purchased from Kanto Chemical Co., Inc. and titrated prior to use. Allylic substrates were dried over CaCl2 and distilled just before use. Other reagents employed in this research were used without further purification. Column chromatography was performed with Merck, neutral Aluminum oxide 90 (70 - 230 mesh ASTM). (5-C5Me5)Ru(amidinate) was prepared from [(5-C5Me5)Ru(OMe)]2 and Li(amidinate) according to the procedure reported previously.1

1H and 13C spectra were recorded on JEOL Lambda 600 and Lambda 400 spectrometers at ambient temperature unless otherwise noted. 1H and 13C NMR chemical shifts are reported in ppm relative to Me4Si or solvent resonances. All coupling constants are reported in Hz. IR spectra were recorded on a JASCO FT/IR-550 spectrometer. Elemental analyses were performed by the Analysis Center in the Faculty of Science of Kyushu University.

**[(5-C5Me5)Ru{PhC(NtBu)2}(allyl)]Cl (2a) and [(5-C5Me5)Ru{PhC(NtBu)2}(allyl)]PF6 (3a).** In a Schlenk tube, (5-C5Me5)Ru{PhC(NtBu)2}(**1a**) (83 mg, 0.177 mmol) was dissolved in dry pentane (ca. 15 mL). To the resulting clear purple solution, allyl chloride (15 L, 0.184 mmol) was added at -78 oC, and the reaction mixture was allowed to warm to room temperature. After 1h, the solvent was removed under reduced pressure to give a yellow solid (85 mg). Spectral data for this product suggests that the crude **2a** contains upto 5% of (5-C5Me5)Ru(allyl)Cl2.2 This crude product was treated with NH4PF6 (29 mg, 0.178 mmol) in CHCl3 (ca. 10 mL) at –78 °C. The reaction mixture was allowed to warm to room temperature and stirred at this temperature for 1h. After removal of the solvent *in vacuo*, and purification by column chromatography [alumina (0.5 cm  1.5 cm); CH2Cl2], followed by recrystallization from CH2Cl2-Et2O **3a** was obtained in 48 % yield (56 mg; yellow crystal). The complex **3a** was directly prepared from **1a** ( 36 mg, 0.077 mmol), allyl chloride (8 L, 0.098 mmol) and NaPF6 (13 mg, 0.077 mmol) in THF (5 mL). The reaction mixture was allowed to warm from –78 C to room temperature and stirred at ambient temperature for 1h. After removal of the solvent *in vacuo*, the residue was purified by column chromatography [alumina (0.5 cm  1.0 cm); CH2Cl2], followed by recrystallization from CH2Cl2-Et2O to give **3a** in 64 % Yield (42 mg ; yellow crystal). Alternatively, **1a** (37 mg, 0.079 mmol) was treated with allyl acetate (9 L, 0.083 mmol) or allyl methyl carbonate (9 L, 0.079 mmol) in the presence of NaPF6 (14 mg, 0.083 mmol) in THF (5 mL) at –78 C, where the mixture was stirred subsequently at room temperature for 1h. After removal of the solvent *in vacuo*, the residue was extracted with several portions of CH2Cl2 (10 mL) and the combined extracts were filtered through Celite to remove insoluble materials. After removal of the solvent *in vacuo*, analytically pure **3a** was obtained without further purification. ( 97 % yield, 50 mg ).

**2a**; 1H NMR (**, in CDCl3): 0.95 (s, 18H, C(CH3)3), 1.90 (s, 15H, C5(CH3)5)), 2.51 (d, *J* = 10.4, 2H, anti-CH of the allyl group), 4.59 (d, *J* = 6.3, 2H, syn-CH of the allyl group), 5.36 (dt, J = 6.3, 10.4, 1H, central-CH of the allyl group), 7.14 (m, 1H, C6H5), 7.24 (m, 1H, C6H5), 7.31 (m, 1H, C6H5), 7.36 (m, 1H, C6H5), 7.44 (m, 1H, C6H5). 13C{1H}NMR (**, in CDCl3): 11.4 (C5(*C*H3)5), 35.5 (C(*C*H3)3), 58.0 (*C*(CH3)3), 60.4 (*C*H2 of the allyl group), 97.4 (*C*H of the allyl group), 106.5 (*C*5(CH3)5), 127.5, 127.6, 127.8, 130.0, 132.6, 138.6 (*C*6H5), 179.0 (N*C*N).

**3a**;Anal. Calcd. for C28H43N2PF6Ru: C, 51.45; H, 6.63; N, 4.29. Found: C, 51.22; H, 6.62; N, 4.34.1H NMR (**, in CDCl3): 0.95 (s, 18H, C(CH3)3), 1.81 (s, 15H, C5(CH3)5)), 2.22 (d, *J* = 10.2, 2H, anti-CH of the allyl group), 4.53 (d, *J* = 6.1, 2H, syn-CH of the allyl group), 5.36 (dt, J = 6.1, 10.2, 1H, central-CH of the allyl group), 7.16 (m, 1H, C6H5), 7.24 (m, 1H, C6H5), 7.32 (m, 1H, C6H5), 7.35 (m, 1H, C6H5), 7.44 (m, 1H, C6H5). 13C{1H}NMR (**, in CDCl3): 10.9 (C5(*C*H3)5), 35.5 (C(*C*H3)3), 58.0 (*C*(CH3)3), 59.7 (*C*H2 of the allyl group), 97.2 (*C*H of the allyl group), 106.6 (*C*5(CH3)5), 127.4, 127.6, 127.8, 129.9, 132.8, 138.6 (*C*6H5), 178.9 (N*C*N). IR (KBr, cm-1) 3437, 2966, 1442, 1208, 1183, 840

**[(5-C5Me5)Ru{PhC(NtBu)2}(methallyl)] PF6 (3b).** The methallyl analogue **3b** was obtained by a procedure similar to that for **3a**. In a typical example, **1a** (40 mg, 0.086 mmol) was treated with methallyl chloride ( 10 L, 0.101 mmol) and NaPF6 (14 mg, 0.083 mmol) in THF (5 mL). After removal of the solvent *in vacuo*, purification by column chromatography [alumina (0.5 cm  1.0 cm); CH2Cl2], followed by recrystallization from CH2Cl2-Et2O, **3b** was obtained. Yield ; 22 mg(39 %).

**3b**;Anal. Calcd. for C29H45N2PF6Ru: C, 52.16; H, 6.79; N, 4.20. Found: C, 52.31; H, 6.80; N, 4.26 1H NMR (**, in CDCl3): 0.96 (s, 18H, C(CH3)3), 1.79 (s, 15H, C5(CH3)5)), 2.28 (s, 2H, anti-CH of the methallyl group), 2.46 (s, 3H, CH3 of the methallyl group), 4.06 (s, 2H, syn-CH of the methallyl group), 7.21 (m, 1H, C6H5), 7.25 (m, 1H, C6H5), 7.32 (m, 1H, C6H5), 7.34 (m, 1H, C6H5), 7.43 (m, 1H, C6H5). 13C{1H} NMR (**, in CDCl3): 11.0 (C5(*C*H3)5), 18.3 (*C*H3 of the methallyl group), 35.7 (C5(*C*H3)5), 57.1 (*C*(CH3)3), 58.1 (*C*H2 of the methallyl group), 106.6 (*C*5(CH3)5), 112.5 (central-C of the methallyl group), 127.2, 127.3, 128.4, 129.9, 133.4, 138.2 (*C*6H5), 177.1 (N*C*N). IR (KBr, cm-1) 3437, 3001, 2966, 1439, 1207, 1183, 842

**[(5-C5Me5)Ru{MeC(NiPr)2}(allyl)]PF6 (3c).** The complex **3c** was obtained by a procedure similar to that for **3a**. In a typical example, **1b** (42 mg, 0.111 mmol) was treated with allyl chloride (11 L, 0.135 mmol) and NaPF6 ( 19 mg, 0.113 mmol) in THF (5 mL). After removal of the solvent *in vacuo*, purification by column chromatography [alumina (0.5 cm  1.0 cm); CH2Cl2], followed by recrystallization from CH2Cl2-Et2O, **3c** was obtained in 62 % yield (39 mg; yellow crystal).

**3c:** Anal. Calcd. for C21H37N2PF6Ru: C, 44.76; H, 6.62; N, 4.97. Found: C, 44.75; H, 6.58; N, 4.90 1H NMR (**, in CDCl3): 1.22 (d, *J* = 7.0 Hz, 6H, CH(C*H*3)2), 1.29 (d, *J* = 7.0 Hz, 6H, CH(C*H*3)2), 1.90 (s, 3H, CCH3), 1.71 (s, 15H, C5(CH3)5), 2.09 (d, *J* = 10.3, 2H, anti-CH of the allyl group), 3.20 (sep, *J* = 7.0 Hz, 2H, C*H*(CH3)2), 4.00 (d, *J* = 6.1, 2H, syn-CH of the allyl group), 4.93 (dt, J = 6.1, 10.3, 1H, central-CH of the allyl group),. 13C{1H}NMR (**, in CDCl3): 9.8 (C5(*C*H3)5), 22.4 (C*C*H3), 25.6 (CH(*C*H3)2), 25.9 (CH(*C*H3)2), 51.0 (*C*H(CH3)2), 60.2 (CH2 of the allyl group), 98.3(CH of the allyl group), 104.9 (*C*5(CH3)5), 174.3 (N*C*N). IR (KBr, cm-1) 3422, 2979, 2932, 1520, 1485, 1457, 1214, 1140, 839

**References**

(1) Y. Yamaguchi, H. Nagashima, *Organometallics*, 2000, **19**, 725.

(2) H. Nagashima, K. Mukai, Y. Shiota, K. Yamaguchi, K. Ara, T. Fukahori, H. Suzuki, M. Akita, Y. Moro-oka, K. Itoh, *Organometallics,* 1990, **9**, 799.
